# Supplementary material for: Comparison of military and civilian surgeon outcomes with emergent trauma laparotomy in a mature military-civilian partnership
Source: PubMed Central journal article supplement — Trauma Surg Acute Care Open. 2024 Mar 1;9(1):e001332. doi: 10.1136/tsaco-2023-001332 (PMC10910416; doi:10.1136/tsaco-2023-001332), 2024-03-01

**Supplemental Figure 1A-B: Number of ETL performed by surgeon in each respective cohort. A): SOST  
B): CIV**

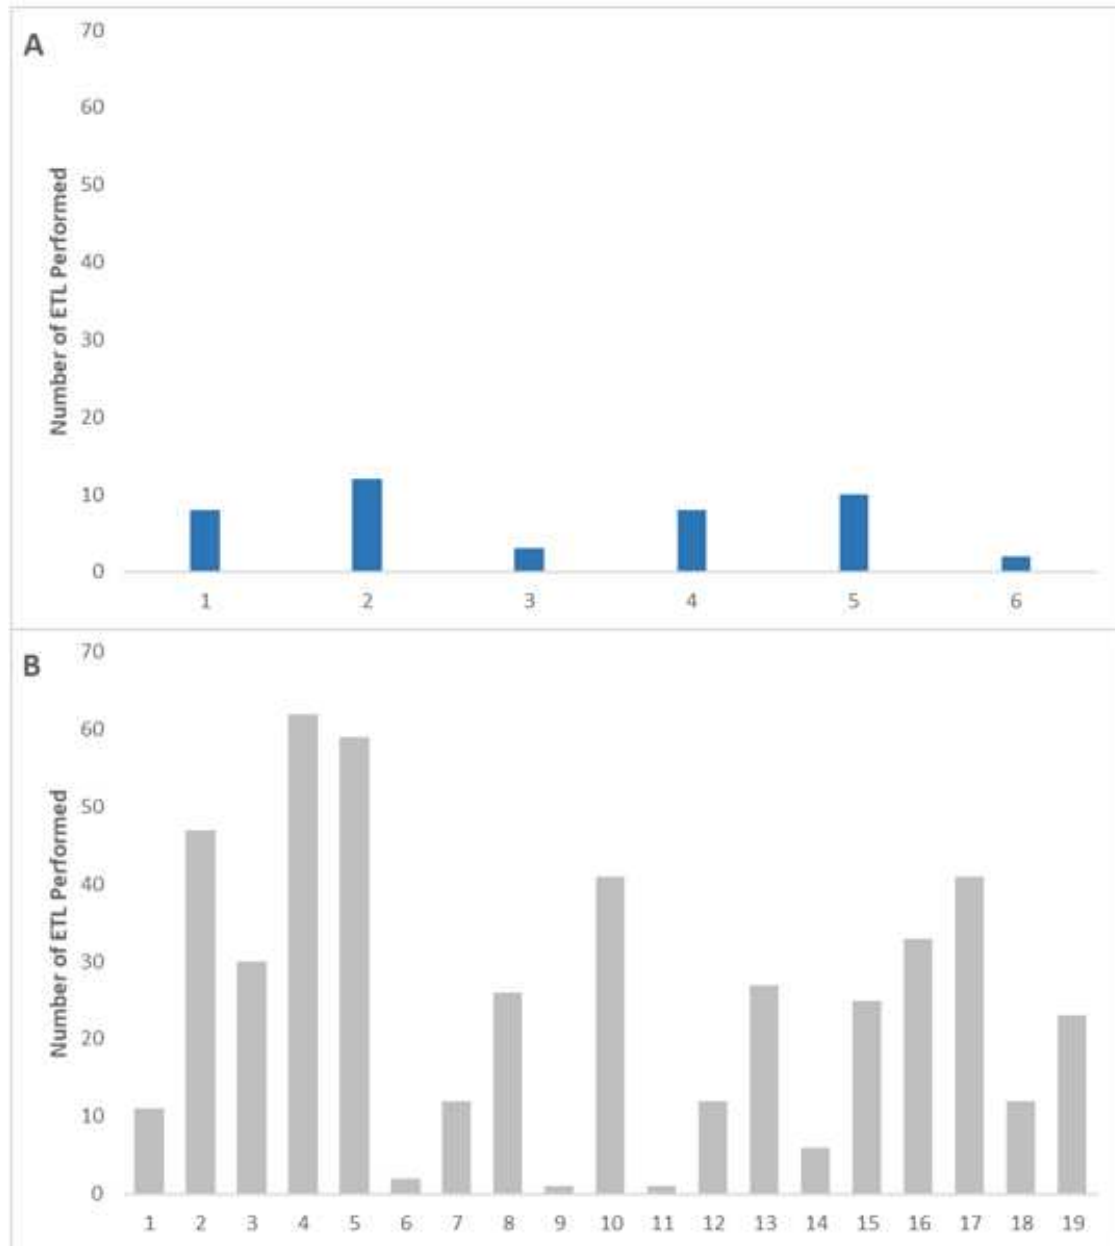

Supplement: tsaco-2023-001332supp001.pdf [file tsaco-2023-001332supp001.pdf]
